# Supplementary material for: Nintedanib for non-IPF progressive pulmonary fibrosis: 12-month outcome data from a real-world multicentre observational study
Source: PubMed Central journal article supplement — ERJ Open Res. 2023 Mar 20;9(2):00423-2022. doi: 10.1183/23120541.00423-2022 (PMC10026008; doi:10.1183/23120541.00423-2022), 2023-03-20
Supplement: 00423-2022.form.pdf [file 00423-2022.form.pdf]

# A National study of Nintedanib for Progressive Fibrosing Interstitial Lung Disease

## 1. AUDIT LOCATION

Name of Hospital.....

## 2. PATIENT DETAILS AND DEMOGRAPHICS

Local ID/MRN (e.g. RBH 001).....

Patient Initials.....

Audit Number (to be assigned by RBH).....

|                                                         |                                     |                                   |                                      |                                   |                                   |
|---------------------------------------------------------|-------------------------------------|-----------------------------------|--------------------------------------|-----------------------------------|-----------------------------------|
| Age at initiation of nintedanib (years)                 |                                     |                                   |                                      |                                   |                                   |
| Sex                                                     | M<br><input type="checkbox"/>       | F<br><input type="checkbox"/>     |                                      |                                   |                                   |
| Ethnicity                                               | White<br><input type="checkbox"/>   | Black<br><input type="checkbox"/> | Asian<br><input type="checkbox"/>    | Mixed<br><input type="checkbox"/> | Other<br><input type="checkbox"/> |
| Smoking                                                 | Current<br><input type="checkbox"/> | Ex<br><input type="checkbox"/>    | Never<br><input type="checkbox"/>    |                                   |                                   |
| Height (m)                                              |                                     |                                   |                                      |                                   |                                   |
| BMI (kg/m <sup>2</sup> )                                |                                     |                                   |                                      |                                   |                                   |
| Known to hospital or community palliative care services | Yes<br><input type="checkbox"/>     | No<br><input type="checkbox"/>    | Not Sure<br><input type="checkbox"/> |                                   |                                   |

## 3. DIAGNOSES

### ILD diagnosis:

|                                                  |                                 |                                |                       |                                                |                          |
|--------------------------------------------------|---------------------------------|--------------------------------|-----------------------|------------------------------------------------|--------------------------|
| Chronic Hypersensitivity Pneumonitis             | Yes<br><input type="checkbox"/> | No<br><input type="checkbox"/> |                       |                                                |                          |
| Autoimmune ILD                                   | Yes<br><input type="checkbox"/> | No<br><input type="checkbox"/> | If yes please specify | Tick                                           |                          |
|                                                  |                                 |                                |                       | Rheumatoid related ILD                         | <input type="checkbox"/> |
|                                                  |                                 |                                |                       | Systemic sclerosis-associated ILD              | <input type="checkbox"/> |
|                                                  |                                 |                                |                       | Mixed connective tissue disease-associated ILD | <input type="checkbox"/> |
| Other autoimmune ILD                             | <input type="checkbox"/>        |                                |                       |                                                |                          |
| Unclassifiable idiopathic interstitial pneumonia | Yes<br><input type="checkbox"/> | No<br><input type="checkbox"/> |                       |                                                |                          |
| Idiopathic non-specific interstitial pneumonia   | Yes<br><input type="checkbox"/> | No<br><input type="checkbox"/> |                       |                                                |                          |
| Other                                            | Yes<br><input type="checkbox"/> | No<br><input type="checkbox"/> | Please Specify        |                                                |                          |

### Comorbidities

.....

.....

.....

.....

.....

.....

.....

### Medication

| Medication (please include Nintedanib and dose) | Dose | Date commenced (Please only complete for immunosuppressive therapy; leave blank if unknown) |
|-------------------------------------------------|------|---------------------------------------------------------------------------------------------|
|                                                 |      |                                                                                             |
|                                                 |      |                                                                                             |
|                                                 |      |                                                                                             |
|                                                 |      |                                                                                             |
|                                                 |      |                                                                                             |
|                                                 |      |                                                                                             |
|                                                 |      |                                                                                             |
|                                                 |      |                                                                                             |
|                                                 |      |                                                                                             |
|                                                 |      |                                                                                             |
|                                                 |      |                                                                                             |
|                                                 |      |                                                                                             |
|                                                 |      |                                                                                             |
|                                                 |      |                                                                                             |
|                                                 |      |                                                                                             |
|                                                 |      |                                                                                             |
|                                                 |      |                                                                                             |
|                                                 |      |                                                                                             |
|                                                 |      |                                                                                             |
|                                                 |      |                                                                                             |
|                                                 |      |                                                                                             |
|                                                 |      |                                                                                             |
|                                                 |      |                                                                                             |
|                                                 |      |                                                                                             |
|                                                 |      |                                                                                             |
|                                                 |      |                                                                                             |

### Immunomodulators (including steroids)

|                                                                      |                              |                         |                             |                                  |
|----------------------------------------------------------------------|------------------------------|-------------------------|-----------------------------|----------------------------------|
| Was a new immunomodulator commenced after Nintedanib initiation?     | Yes <input type="checkbox"/> |                         | No <input type="checkbox"/> | Unknown <input type="checkbox"/> |
|                                                                      | Drug(s)                      | Indication for starting |                             |                                  |
| Were any immunomodulators discontinued after Nintedanib initiation?  | Yes <input type="checkbox"/> |                         | No <input type="checkbox"/> | Unknown <input type="checkbox"/> |
|                                                                      | Drug(s)                      | Indication for stopping |                             |                                  |
| Was the dose of immunomodulator changed after Nintedanib initiation? | Yes <input type="checkbox"/> |                         | No <input type="checkbox"/> | Unknown <input type="checkbox"/> |
|                                                                      | Drug(s)                      | Indication for change   |                             |                                  |

### Severity of disease

|                          |                                                                   |                                                                |                             |                                    |
|--------------------------|-------------------------------------------------------------------|----------------------------------------------------------------|-----------------------------|------------------------------------|
| MRC dyspnoea grade (1-5) |                                                                   |                                                                |                             | Not Known <input type="checkbox"/> |
| Home Oxygen              | Yes <input type="checkbox"/>                                      |                                                                | No <input type="checkbox"/> | Not Known <input type="checkbox"/> |
|                          | Ambulatory <input type="checkbox"/>                               | LTOT <input type="checkbox"/>                                  |                             |                                    |
|                          | Commenced prior to Nintedanib initiation <input type="checkbox"/> | Commenced after Nintedanib initiation <input type="checkbox"/> |                             |                                    |
| Was the patient ever     | Yes <input type="checkbox"/>                                      | Declined <input type="checkbox"/>                              | No <input type="checkbox"/> | Not Known <input type="checkbox"/> |
|                          |                                                                   | Under assessment <input type="checkbox"/>                      |                             |                                    |

|                          |  |                                                            |  |  |
|--------------------------|--|------------------------------------------------------------|--|--|
| referred for transplant? |  | On active transplant waiting list <input type="checkbox"/> |  |  |
|--------------------------|--|------------------------------------------------------------|--|--|

**Family history**

|                                                  |                                 |                                |                                     |                                   |  |  |  |
|--------------------------------------------------|---------------------------------|--------------------------------|-------------------------------------|-----------------------------------|--|--|--|
| Does the patient have a familial history of ILD? | Yes<br><input type="checkbox"/> | No<br><input type="checkbox"/> | Unknown<br><input type="checkbox"/> | <b>IF YES</b> Specify type of ILD |  |  |  |
|                                                  | First Degree Relatives          |                                | Second Degree Relatives             |                                   |  |  |  |
|                                                  | Yes<br><input type="checkbox"/> | No<br><input type="checkbox"/> | Yes<br><input type="checkbox"/>     | No<br><input type="checkbox"/>    |  |  |  |

**4. BASIS FOR ENTRY ONTO THE PROGRAMME – Please send anonymised Nintedanib initiation proforma**

Date accepted onto the programme.....

Date of initiation of Nintedanib.....

| Indication for entry onto programme (select all that apply) | YES                      | NO                       | DETAILS |
|-------------------------------------------------------------|--------------------------|--------------------------|---------|
| Progressive symptoms                                        | <input type="checkbox"/> | <input type="checkbox"/> |         |
| Progressive fibrosis on CT                                  | <input type="checkbox"/> | <input type="checkbox"/> |         |
| Progressive decline in lung function                        | <input type="checkbox"/> | <input type="checkbox"/> |         |
| Increasing oxygen requirement                               | <input type="checkbox"/> | <input type="checkbox"/> |         |
| Other (please specify)                                      | <input type="checkbox"/> | <input type="checkbox"/> |         |

**5. RADIOLOGY- Please attach anonymised reports of all previous CT scans**

|                                           | Initial CT preceding nintedanib                     | CT at initiation of nintedanib (leave blank if no CT) | Follow up CT scan post nintedanib initiation (leave blank if no CT) |
|-------------------------------------------|-----------------------------------------------------|-------------------------------------------------------|---------------------------------------------------------------------|
| Date of CT                                |                                                     |                                                       |                                                                     |
| CT report                                 |                                                     |                                                       |                                                                     |
| Progression of fibrosis from previous CT? | YES<br><input type="checkbox"/>                     | NO<br><input type="checkbox"/>                        | YES<br><input type="checkbox"/>                                     |
| Predominant radiological ILD pattern      | Usual interstitial pneumonia (UIP)                  |                                                       | <input type="checkbox"/>                                            |
|                                           | Fibrotic non-specific interstitial pneumonia (NSIP) |                                                       | <input type="checkbox"/>                                            |
|                                           | Fibrotic hypersensitivity pneumonitis (HSP)         |                                                       | <input type="checkbox"/>                                            |

|  |                                    |                                       |
|--|------------------------------------|---------------------------------------|
|  | Fibrotic organising pneumonia (OP) | <input type="checkbox"/>              |
|  | Fibrotic sarcoid                   | <input type="checkbox"/>              |
|  | Other                              | <input type="checkbox"/><br>(specify) |

**6. LUNG FUNCTION – Please attach serial formal lung function reports including any tests performed prior to those entered in the table below**

|                                | 24 months prior to Nintedanib initiation (+/- 6 months) | 12 months prior to Nintedanib (+/- 6 months) | At initiation of Nintedanib (+/- 6 months) | 12 months after initiation of Nintedanib (+/- 6 months) |
|--------------------------------|---------------------------------------------------------|----------------------------------------------|--------------------------------------------|---------------------------------------------------------|
| Date of lung function          |                                                         |                                              |                                            |                                                         |
| Weight at time of test         |                                                         |                                              |                                            |                                                         |
| Height at time of test         |                                                         |                                              |                                            |                                                         |
| FEV <sub>1</sub> (L)           |                                                         |                                              |                                            |                                                         |
| FEV <sub>1</sub> (% predicted) |                                                         |                                              |                                            |                                                         |
| FVC (L)                        |                                                         |                                              |                                            |                                                         |
| FVC (% predicted)              |                                                         |                                              |                                            |                                                         |
| TLco                           |                                                         |                                              |                                            |                                                         |
| TLco (% predicted)             |                                                         |                                              |                                            |                                                         |
| Kco                            |                                                         |                                              |                                            |                                                         |
| Kco (% predicted)              |                                                         |                                              |                                            |                                                         |

**7. SYMPTOMATIC PROGRESSION**

Please rate the patient's symptoms according to the following scale (leave blank if no data):

- 1: Rapid/severe deterioration
- 2: Mild/moderate deterioration
- 3: No change
- 4: Mild/moderate improvement
- 5: Significant improvement

|                    | 12 months preceding Nintedanib initiation                                                                                                          | Since Nintedanib initiation                                                                                                                        |
|--------------------|----------------------------------------------------------------------------------------------------------------------------------------------------|----------------------------------------------------------------------------------------------------------------------------------------------------|
| Dyspnoea           | <input type="checkbox"/> 1<br><input type="checkbox"/> 2<br><input type="checkbox"/> 3<br><input type="checkbox"/> 4<br><input type="checkbox"/> 5 | <input type="checkbox"/> 1<br><input type="checkbox"/> 2<br><input type="checkbox"/> 3<br><input type="checkbox"/> 4<br><input type="checkbox"/> 5 |
| Cough              | <input type="checkbox"/> 1<br><input type="checkbox"/> 2<br><input type="checkbox"/> 3<br><input type="checkbox"/> 4<br><input type="checkbox"/> 5 | <input type="checkbox"/> 1<br><input type="checkbox"/> 2<br><input type="checkbox"/> 3<br><input type="checkbox"/> 4<br><input type="checkbox"/> 5 |
| Exercise tolerance | <input type="checkbox"/> 1<br><input type="checkbox"/> 2<br><input type="checkbox"/> 3                                                             | <input type="checkbox"/> 1<br><input type="checkbox"/> 2<br><input type="checkbox"/> 3                                                             |

|                                        |                                                                                                                                                    |                                                                                                                                                    |
|----------------------------------------|----------------------------------------------------------------------------------------------------------------------------------------------------|----------------------------------------------------------------------------------------------------------------------------------------------------|
|                                        | <input type="checkbox"/> 4<br><input type="checkbox"/> 5                                                                                           | <input type="checkbox"/> 4<br><input type="checkbox"/> 5                                                                                           |
| Other symptom related to ILD (specify) | <input type="checkbox"/> 1<br><input type="checkbox"/> 2<br><input type="checkbox"/> 3<br><input type="checkbox"/> 4<br><input type="checkbox"/> 5 | <input type="checkbox"/> 1<br><input type="checkbox"/> 2<br><input type="checkbox"/> 3<br><input type="checkbox"/> 4<br><input type="checkbox"/> 5 |

Did the patient have a health-related quality of life score (e.g. K-BILD, EQ 5D)?

YES  NO

| Name of score | 12 months prior to Nintedanib (+/- 6 months) | At initiation of Nintedanib (+/- 6 months) | 12 months after initiation of Nintedanib (+/- 6 months) |
|---------------|----------------------------------------------|--------------------------------------------|---------------------------------------------------------|
| Date of score |                                              |                                            |                                                         |
| Score         |                                              |                                            |                                                         |

### 8. ADVERSE DRUG EVENTS

|                                                                                                               | YES                      | NO                       | Unknown/<br>not<br>applicable | DETAILS/REASON                       |                             |
|---------------------------------------------------------------------------------------------------------------|--------------------------|--------------------------|-------------------------------|--------------------------------------|-----------------------------|
| Did the patient experience adverse effects of Nintedanib?                                                     | <input type="checkbox"/> | <input type="checkbox"/> | <input type="checkbox"/>      | <i>Specify adverse effects</i>       |                             |
| Did the patient develop hepatotoxicity?                                                                       | <input type="checkbox"/> | <input type="checkbox"/> | <input type="checkbox"/>      |                                      |                             |
| Did the patient develop GI side effects?                                                                      | <input type="checkbox"/> | <input type="checkbox"/> | <input type="checkbox"/>      | <i>Specify GI effects</i>            |                             |
| Did the patient require anti-diarrhoeal medication?                                                           | <input type="checkbox"/> | <input type="checkbox"/> | <input type="checkbox"/>      |                                      |                             |
| Was the dose of Nintedanib reduced?                                                                           | <input type="checkbox"/> | <input type="checkbox"/> | <input type="checkbox"/>      | <i>Reason for change</i>             |                             |
|                                                                                                               |                          |                          |                               | <i>Dose change 1 (inc frequency)</i> | <i>Duration on new dose</i> |
|                                                                                                               |                          |                          |                               | <i>Dose change 2 (inc frequency)</i> | <i>Duration on new dose</i> |
| Did the patient require dose reduction of other immunosuppressive therapy (e.g. MMF) to improve tolerability? | <input type="checkbox"/> | <input type="checkbox"/> | <input type="checkbox"/>      | <i>Specify drug and reason</i>       |                             |
| Did the patient experience weight loss                                                                        | <input type="checkbox"/> | <input type="checkbox"/> | <input type="checkbox"/>      | <i>Specify amount</i>                |                             |
| Did the patient experience bleeding                                                                           | <input type="checkbox"/> | <input type="checkbox"/> | <input type="checkbox"/>      | <i>Specify</i>                       |                             |
| Did the patient require a change in anticoagulant therapy?                                                    | <input type="checkbox"/> | <input type="checkbox"/> | <input type="checkbox"/>      | <i>Drug, change and reason</i>       |                             |
| Did the patient experience angina or other evidence of ischaemic heart disease                                | <input type="checkbox"/> | <input type="checkbox"/> | <input type="checkbox"/>      | <i>Specify</i>                       |                             |
| Is the patient still on Nintedanib at 12 months                                                               | <input type="checkbox"/> | <input type="checkbox"/> | <input type="checkbox"/>      | If NO:                               |                             |
|                                                                                                               |                          |                          |                               | Reason for discontinuation           |                             |
|                                                                                                               |                          |                          |                               | Duration of treatment (months)       |                             |

### 9. RESPIRATORY HOSPITALISATIONS

|  |                                           |                                           |
|--|-------------------------------------------|-------------------------------------------|
|  | 12 months preceding Nintedanib initiation | 12 months following Nintedanib initiation |
|--|-------------------------------------------|-------------------------------------------|

|                                                               |  |  |
|---------------------------------------------------------------|--|--|
| Total number of hospital admissions with respiratory symptoms |  |  |
| GP attendances with worsening of respiratory symptoms         |  |  |

**COVID-19 data**

|                                                                   | Yes                      | No                       | Unknown                  |                                                                                                                                                                                |
|-------------------------------------------------------------------|--------------------------|--------------------------|--------------------------|--------------------------------------------------------------------------------------------------------------------------------------------------------------------------------|
| Was the patient shielding during the national COVID-19 lock down? | <input type="checkbox"/> | <input type="checkbox"/> | <input type="checkbox"/> |                                                                                                                                                                                |
| Did the patient suffer from COVID-19 infection?                   | <input type="checkbox"/> | <input type="checkbox"/> | <input type="checkbox"/> | <b>IF YES:</b><br>Clinical diagnosis <input type="checkbox"/><br>Confirmed diagnosis (PCR) <input type="checkbox"/><br>Confirmed diagnosis (Serology) <input type="checkbox"/> |

**10. ACUTE EXACERBATIONS OF ILD**

|                                                                     | 12 months preceding Nintedanib initiation | 12 months following Nintedanib initiation |
|---------------------------------------------------------------------|-------------------------------------------|-------------------------------------------|
| Total number of hospital admissions with acute exacerbations of ILD |                                           |                                           |
| GP attendances with acute exacerbation of ILD                       |                                           |                                           |

**11. SURVIVAL**

|                                                                   | Yes                      | No                       | If <b>NO</b> :                                           |
|-------------------------------------------------------------------|--------------------------|--------------------------|----------------------------------------------------------|
| Is the patient alive at 12 months following nintedanib initiation | <input type="checkbox"/> | <input type="checkbox"/> | Cause of death                                           |
|                                                                   |                          |                          | How long after initiation of nintedanib did patient die? |
