# Supplementary material for: Nintedanib for non-IPF progressive pulmonary fibrosis: 12-month outcome data from a real-world multicentre observational study
Source: PubMed Central journal article supplement — ERJ Open Res. 2023 Mar 20;9(2):00423-2022. doi: 10.1183/23120541.00423-2022 (PMC10026008; doi:10.1183/23120541.00423-2022), 2023-03-20
Supplement: 00423-2022.supplement.pdf [file 00423-2022.supplement.pdf]

## **Supplementary information: Nintedanib for non-IPF progressive pulmonary fibrosis: 12-month outcome data from a real-world multicentre observational study**

1. Supplementary Document 1: Study CRF
2. Supplementary Figure 1: Difference between pre-initiation and post-initiation delta lung function in restricted analysis (N=64).
3. Supplementary Figure 2: Difference in change in lung function according to patient sex (N=123)
4. Supplementary Figure 3: Difference between pre-initiation and post-initiation delta lung function in restricted analysis according to subgroups (N=64).
5. Supplementary Figure 4: Lung function change according to nintedanib dose reduction (N=123)
6. Supplementary Figure 5: Timeline figure showing the data collection used for the study analysis at each visit
7. Supplementary Table 1: Complete clinical data
8. Supplementary Table 2: Rate of Lung function change pre and post-nintedanib, with difference overall and by subgroup (N=123)
9. Supplementary Table 3: Sensitivity analyses of rate of ppFVC change per year (N=122)
10. Supplementary Table 4: Lung function according to changes in nintedanib dose (N=72)
11. Supplementary Table 5: Lung function according to changes in concurrent immunosuppression (N=72)

**Supplementary Table 1: Complete clinical data**

|                            | <b>Time point</b>    | <b>N=126</b> | <b>%</b> |
|----------------------------|----------------------|--------------|----------|
| <b>FVC</b>                 |                      |              |          |
|                            | Pre-nintedanib       | 113          | 89.7%    |
|                            | Treatment initiation | 103          | 81.7%    |
|                            | Post-nintedanib      | 84           | 66.7%    |
| <b>ppFVC</b>               |                      |              |          |
|                            | Pre-nintedanib       | 112          | 88.9%    |
|                            | Treatment initiation | 102          | 81.0%    |
|                            | Post-nintedanib      | 85           | 67.5%    |
| <b>ppDLCO</b>              |                      |              |          |
|                            | Pre-nintedanib       | 104          | 82.5%    |
|                            | Treatment initiation | 79           | 62.7%    |
|                            | Post-nintedanib      | 68           | 54.0%    |
| <b>ppKCO</b>               |                      |              |          |
|                            | Pre-nintedanib       | 95           | 75.4%    |
|                            | Treatment initiation | 74           | 58.7%    |
|                            | Post-nintedanib      | 65           | 51.6%    |
| <b>Shortness of breath</b> |                      |              |          |
|                            | Treatment initiation | 113          | 89.7%    |
|                            | Post-nintedanib      | 103          | 81.7%    |
| <b>Cough</b>               |                      |              |          |
|                            | Treatment initiation | 78           | 61.9%    |
|                            | Post-nintedanib      | 78           | 61.9%    |
| <b>Exercise tolerance</b>  |                      |              |          |
|                            | Treatment initiation | 112          | 88.9%    |
|                            | Post-nintedanib      | 101          | 80.2%    |

Complete data available for each of the above fields at the various points

**Supplementary Table 2. Rate of Lung function change pre and post-nintedanib, with difference overall and by subgroup (N=123)**

|                   | n   | Rate pre | 95%CI              | Rate post | 95%CI             | Difference | 95%CI          | p     |
|-------------------|-----|----------|--------------------|-----------|-------------------|------------|----------------|-------|
| <b>FVC (ml)</b>   |     |          |                    |           |                   |            |                |       |
| Overall           | 123 | -239.86  | -292.71 to -187.01 | -88.79    | -156.23 to -21.34 | 151.23     | 47.45; 255.01  | 0.004 |
| Diagnosis         |     |          |                    |           |                   |            |                |       |
| fHP               | 42  | -232.8   | -313.8 to -151.8   | -109.8    | -219.6 to 0.05    | 125.4      | -18.4 to 269.1 | 0.087 |
| CTD-ILD           | 44  | -190.8   | -276.0 to -105.7   | -66.3     | -179.1 to 46.4    | 122.5      | -47.7 to 292.7 | 0.158 |
| Other             | 37  | -281.1   | -391.0 to -171.2   | -113.1    | -243.6 to 17.4    | 172.7      | -25.8 to 371.2 | 0.088 |
| CT pattern        |     |          |                    |           |                   |            |                |       |
| UIP               | 29  | -246.3   | -370.1 to -122.5   | -120.6    | -271.5 to 30.3    | 123.8      | -94.3 to 342.0 | 0.266 |
| Non-UIP           | 93  | -225.5   | -279.8 to -171.2   | -87.1     | -162.5 to -11.8   | 138.1      | 30.7 to 245.4  | 0.012 |
| Sex               |     |          |                    |           |                   |            |                |       |
| Male              | 57  | -295.9   | -379.1 to -212.6   | -100.7    | -198.4 to -2.9    | 193.4      | 27.2 to 359.6  | 0.023 |
| Female            | 66  | -168.3   | -215.3 to -121.4   | -90.2     | -180.7 to 0.3     | 79.9       | -16.0 to 175.8 | 0.102 |
| <b>ppDLco (%)</b> |     |          |                    |           |                   |            |                |       |
| Overall           | 114 | -6.06    | -7.35 to -4.77     | -2.13     | -4.06 to -0.20    | 3.93       | 1.27 to 6.60   | 0.004 |
| Diagnosis         |     |          |                    |           |                   |            |                |       |
| fHP               | 39  | -7.5     | -9.3 to -5.6       | -2.5      | -5.7 to 0.6       | 5          | 1.1 to 8.9     | 0.013 |
| CTD-ILD           | 42  | -3.9     | -5.9 to -1.9       | -3.3      | -6.4 to -0.3      | 0.6        | -3.9 to 5.1    | 0.803 |
| Other             | 33  | -6.7     | -9.2 to -4.2       | -0.1      | -4.4 to 4.2       | 6.6        | 1.9 to 11.4    | 0.006 |
| CT pattern        |     |          |                    |           |                   |            |                |       |
| UIP               | 27  | -6.5     | -8.8 to -4.2       | -3.8      | -7.7 to 0.2       | 2.6        | -2.5 to 7.7    | 0.312 |
| Non-UIP           | 86  | -5.8     | -7.2 to -4.3       | -1.7      | -3.9 to 0.5       | 4          | 1.0 to 7.1     | 0.009 |
| Sex               |     |          |                    |           |                   |            |                |       |
| Male              | 53  | -7.2     | -8.9 to -5.4       | -3.8      | -6.4 to -1.1      | 3.4        | -0.6 to 7.3    | 0.092 |
| Female            | 61  | -4.6     | -6.3 to -3.0       | -0.6      | -3.2 to 2.0       | 4          | 0.8 to 7.2     | 0.014 |
| <b>Kco (%)</b>    |     |          |                    |           |                   |            |                |       |
| Overall           | 108 | -5.7     | -8.36 to -3.04     | -1.26     | -5.18 to -2.65    | 4.43       | -0.99 to 9.86  | 0.109 |
| Diagnosis         |     |          |                    |           |                   |            |                |       |
| fHP               | 38  | -8.6     | -13.3 to -4.0      | 0.2       | -6.4 to 6.7       | 9          | -0.8 to 18.7   | 0.071 |
| CTD-ILD           | 39  | -4.4     | -10.2 to 1.5       | -2.1      | -8.35 to 4.1      | 2.3        | -8.2 to 12.8   | 0.666 |
| Other             | 31  | -4.2     | -8.4 to 0.1        | -2.9      | -11.9 to 6.1      | 1.3        | -6.3 to 8.9    | 0.732 |
| CT pattern        |     |          |                    |           |                   |            |                |       |
| UIP               | 25  | -6.5     | -11.2 to -1.7      | 1.4       | -6.7 to 9.4       | 8.1        | -2.2 to 18.3   | 0.122 |
| Non-UIP           | 82  | -5.5     | -8.7 to -2.3       | -2.2      | -6.8 to 2.3       | 3.3        | -3.1 to 9.9    | 0.314 |
| Sex               |     |          |                    |           |                   |            |                |       |
| Male              | 51  | -7.3     | -11.2 to -3.4      | -5.4      | -10.8 to 0.02     | 1.9        | -6.1 to 9.9    | 0.647 |
| Female            | 57  | -4       | -7.5 to -0.5       | 2.35      | -2.9 to 7.6       | 6.2        | -0.7 to 13.2   | 0.079 |

Rate of lung function change estimated from longitudinal multilevel models for repeat measures adjusted for age, sex, diagnostic group, radiologic pattern and early cessation of treatment (<12 months). Difference between groups estimated with restricted linear spline include knot at initiation.

**Supplementary Table 3. Sensitivity analyses of rate of ppFVC change per year (N=122)**

| Sensitivity analysis  | Rate pre |                | Rate post |                | Difference |               | p     |
|-----------------------|----------|----------------|-----------|----------------|------------|---------------|-------|
|                       | %        | 95%CI          | %         | 95%CI          | %          | 95%CI         |       |
| ppFVC                 |          |                |           |                |            |               |       |
| 1. Overall            | -6.91    | -8.45 to -5.36 | -2.57     | -4.59 to -0.54 | 4.34       | 1.35 to 7.33  | 0.004 |
| 2. Time continuous/yr | -6.63    | -8.47 to -4.79 | -2.96     | -5.18 to -0.74 | 3.67       | 0.32 to 7.02  | 0.032 |
| 3. Imputation I       | -6.02    | -8.27 to -3.77 | -3.35     | -5.68 to -1.03 | 2.67       | -1.28 to 6.61 | 0.185 |
| 4. Imputation II      | -5.25    | -6.73 to -3.77 | -2.75     | -4.23 to 1.27  | 2.50       | -0.07 to 5.06 | 0.057 |
| 5. Imputation III     | -6.86    | -8.29 to -5.42 | -3.84     | -5.27 to -2.40 | 3.02       | 0.72 to 5.32  | 0.010 |

1. Overall analysis: identical to primary analysis with use of percent predicted FVC as outcome.
2. Time continuous: timing of ppFVC record from nintedanib initiation modelled as continuous variable rather than discrete time point.
3. Imputation I: missing ppFVC imputed at cohort median per time point (pre, initiation, post).
4. Imputation II: missing ppFVC imputed as carried backward or forward from non-missing time point.
5. Imputation III: missing ppFVC imputed at 10% relative decline from pre-nintedanib to initiation and initiation to post-nintedanib.

**Supplementary Table 4. Lung function according to changes in nintedanib dose**

| Nintedanib dose | Change FVC (%) post-nintedanib    |       |       |       | Difference in FVC change pre vs post nintedanib  |       |       |       |
|-----------------|-----------------------------------|-------|-------|-------|--------------------------------------------------|-------|-------|-------|
|                 | n                                 | mean  | SD    | p     | n                                                | mean  | SD    | p     |
| Maintained      | 51                                | -3.69 | 7.77  |       | 46                                               | 2.09  | 11.38 |       |
| Reduced         | 21                                | -0.80 | 7.60  | 0.154 | 17                                               | 4.91  | 8.51  | 0.357 |
|                 | Change in DLco(%) post-nintedanib |       |       |       | Difference in DLco change pre vs post-nintedanib |       |       |       |
|                 | n                                 | mean  | SD    | p     | n                                                | mean  | SD    | p     |
| Maintained      | 38                                | -2.89 | 6.49  |       | 33                                               | 3.53  | 8.07  |       |
| Reduced         | 16                                | -1.53 | 4.94  | 0.456 | 13                                               | 1.38  | 8.98  | 0.436 |
|                 | Change in Kco(%) post-nintedanib  |       |       |       | Difference in Kco change pre vs post-nintedanib  |       |       |       |
|                 | n                                 | mean  | SD    | p     | n                                                | mean  | SD    | p     |
| Maintained      | 36                                | -0.88 | 13.91 |       | 31                                               | 6.13  | 18.53 |       |
| Reduced         | 15                                | -4.16 | 7.66  | 0.395 | 10                                               | -3.71 | 14.13 | 0.133 |

**Supplementary Table 5. Lung function according to changes in concurrent immunosuppression**

|                        |    | Change FVC (%) post-nintedanib    |       |       | Difference in FVC change pre vs post nintedanib  |       |       |       |
|------------------------|----|-----------------------------------|-------|-------|--------------------------------------------------|-------|-------|-------|
|                        | N  | mean                              | SD    | p     | n                                                | mean  | SD    | p     |
| Immunosuppressant dose |    |                                   |       |       |                                                  |       |       |       |
| Increased              | 9  | -4.19                             | 9.93  |       | 9                                                | -0.60 | 11.45 |       |
| Maintained             | 40 | -3.55                             | 7.57  |       | 32                                               | 1.89  | 11.05 |       |
| Reduced                | 23 | -1.11                             | 7.30  | 0.425 | 22                                               | 5.66  | 9.61  | 0.261 |
|                        |    | Change in DLco(%) post-nintedanib |       |       | Difference in DLco change pre vs post-nintedanib |       |       |       |
|                        | N  | mean                              | SD    | p     | n                                                | mean  | SD    | p     |
| Immunosuppressant dose |    |                                   |       |       |                                                  |       |       |       |
| Increased              | 6  | -1.45                             | 7.29  |       | 6                                                | 4.70  | 11.25 |       |
| Maintained             | 31 | -3.15                             | 6.30  |       | 24                                               | 0.25  | 5.68  |       |
| Reduced                | 17 | -1.63                             | 5.35  | 0.652 | 16                                               | 6.27  | 9.49  | 0.065 |
|                        |    | Change in Kco(%) post-nintedanib  |       |       | Difference in Kco change pre vs post-nintedanib  |       |       |       |
|                        | N  | mean                              | SD    | p     | n                                                | mean  | SD    | p     |
| Immunosuppressant dose |    |                                   |       |       |                                                  |       |       |       |
| Increased              | 6  | 5.08                              | 16.06 |       | 6                                                | 10.53 | 26.43 |       |
| Maintained             | 28 | -2.31                             | 12.66 |       | 21                                               | 1.60  | 16.84 |       |
| Reduced                | 17 | -3.52                             | 10.46 | 0.337 | 14                                               | 4.02  | 15.91 | 0.570 |
